# Supplementary material
Source: PubMed Central journal article supplement (PMC4192070)
Supplement: NIHMS628422-supplement-01.pdf [file NIHMS628422-supplement-01.pdf]

**Supplemental Table:** Distribution of inflammatory adverse events by symptom type.

| Adverse Event Subtype                     | N  |
|-------------------------------------------|----|
| Dermatologic only                         | 31 |
| Constitutional only                       | 9  |
| Pulmonary only                            | 5  |
| Dermatologic + Pulmonary                  | 2  |
| Dermatologic + Constitutional             | 8  |
| Pulmonary + Constitutional                | 1  |
| Dermatologic + Pulmonary + Constitutional | 1  |
| Any inflammatory adverse event            | 57 |
